# Supplementary material for: Which Histometric Analysis Approach Is More Reliable for Assessing Histological Bone Tissue Samples?
Source: MDPI journal article supplement (doi:10.3390/medicina58101364), 2022-09-28
Supplement: s1 [file s1]

Table S1. Data for the new bone formation using the grid of Merz and ImageJ

| Samples                         | Mean of bone formed using<br>the grid of Merz (%) | Mean of bone formed<br>using ImageJ (%) | Difference between<br>methods | Mean of methods |
|---------------------------------|---------------------------------------------------|-----------------------------------------|-------------------------------|-----------------|
| 1                               | 46                                                | 46,1                                    | -0,1                          | 46,05           |
| 2                               | 33                                                | 29,4                                    | 3,6                           | 31,2            |
| 3                               | 39                                                | 40,1                                    | -1,1                          | 39,55           |
| 4                               | 27                                                | 40,7                                    | -13,7                         | 33,85           |
| 5                               | 24                                                | 19,6                                    | 4,4                           | 21,8            |
| 6                               | 33                                                | 40,4                                    | -7,4                          | 36,7            |
| 7                               | 26                                                | 29,5                                    | -3,5                          | 27,75           |
| 8                               | 27                                                | 28,1                                    | -1,1                          | 27,55           |
| 9                               | 27                                                | 30                                      | -3                            | 28,5            |
| 10                              | 38                                                | 19,2                                    | 18,8                          | 28,6            |
| 11                              | 26                                                | 17,5                                    | 8,5                           | 21,75           |
| 12                              | 34                                                | 50                                      | -16                           | 42              |
| 13                              | 28                                                | 44                                      | -16                           | 36              |
| 14                              | 35                                                | 45,2                                    | -10,2                         | 40,1            |
| 15                              | 34                                                | 38                                      | -4                            | 36              |
| 16                              | 34                                                | 34,8                                    | -0,8                          | 34,4            |
| 17                              | 33                                                | 27                                      | 6                             | 30              |
| 18                              | 13                                                | 1,9                                     | 11,1                          | 7,45            |
| 19                              | 33                                                | 30,4                                    | 2,6                           | 31,7            |
| 20                              | 30                                                | 17,7                                    | 12,3                          | 23,85           |
| 21                              | 28                                                | 34,5                                    | -6,5                          | 31,25           |
| 22                              | 19                                                | 0                                       | 19                            | 9,5             |
| 23                              | 31                                                | 23,9                                    | 7,1                           | 27,45           |
| 24                              | 34                                                | 44                                      | -10                           | 39              |
| 25                              | 51                                                | 55,2                                    | -4,2                          | 53,1            |
| 26                              | 23                                                | 57,2                                    | -34,2                         | 40,1            |
| 27                              | 66                                                | 59,3                                    | 6,7                           | 62,65           |
| 28                              | 24                                                | 18,4                                    | 5,6                           | 21,2            |
| 29                              | 46                                                | 52,7                                    | -6,7                          | 49,35           |
| 30                              | 70                                                | 74,9                                    | -4,9                          | 72,45           |
| Mean of bone<br>formed $\pm$ SD | 33.7 $\pm$ 12.2                                   | 35.0 $\pm$ 16.8                         |                               |                 |
| Average of<br>differences       |                                                   |                                         | -1,3                          |                 |
| SD of differences               |                                                   |                                         | 11,0                          |                 |
| <i>t-test</i>                   |                                                   |                                         | 0.608                         |                 |
